# Supplementary material for: Endothelial STING and STAT1 mediate IFN-independent effects of IL-6 in an endotoxemia-induced model of shock
Source: JCI journal article supplement (doi:10.1172/jci189570), 2025-09-16
Supplement: sd1 [file 1]

## Supplemental Figure 2

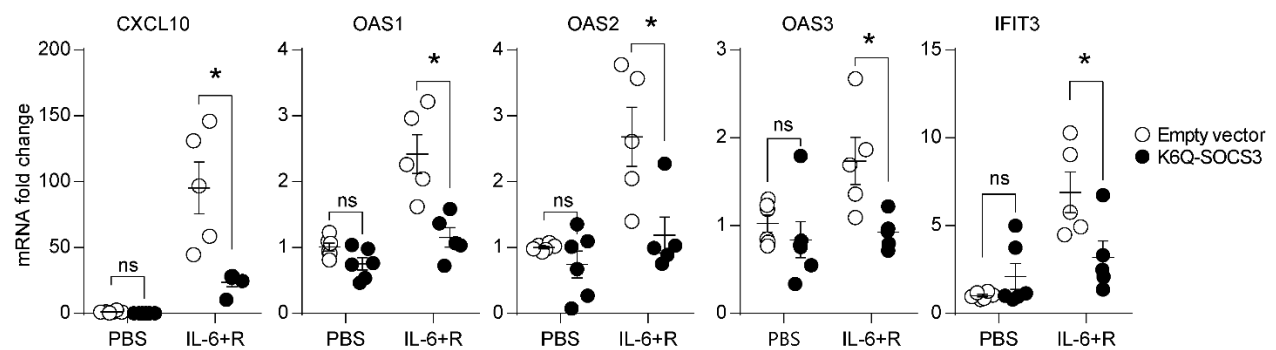

**Supplemental Figure 2. SOCS3 overexpression prevents IL-6+R-induced ISG expression.** Cells were transduced with an empty vector, or a vector coding for a stabilized form of SOCS3, as we described previously(18). Cells were treated for 2 hours with or without IL-6+R prior to lysis and RNA extraction for RT-qPCR. Data combined from three independent experiments performed in duplicate each. \*  $p < 0.05$ , Two-way ANOVA and Sidak post-hoc test.



Supplemental Figure 4

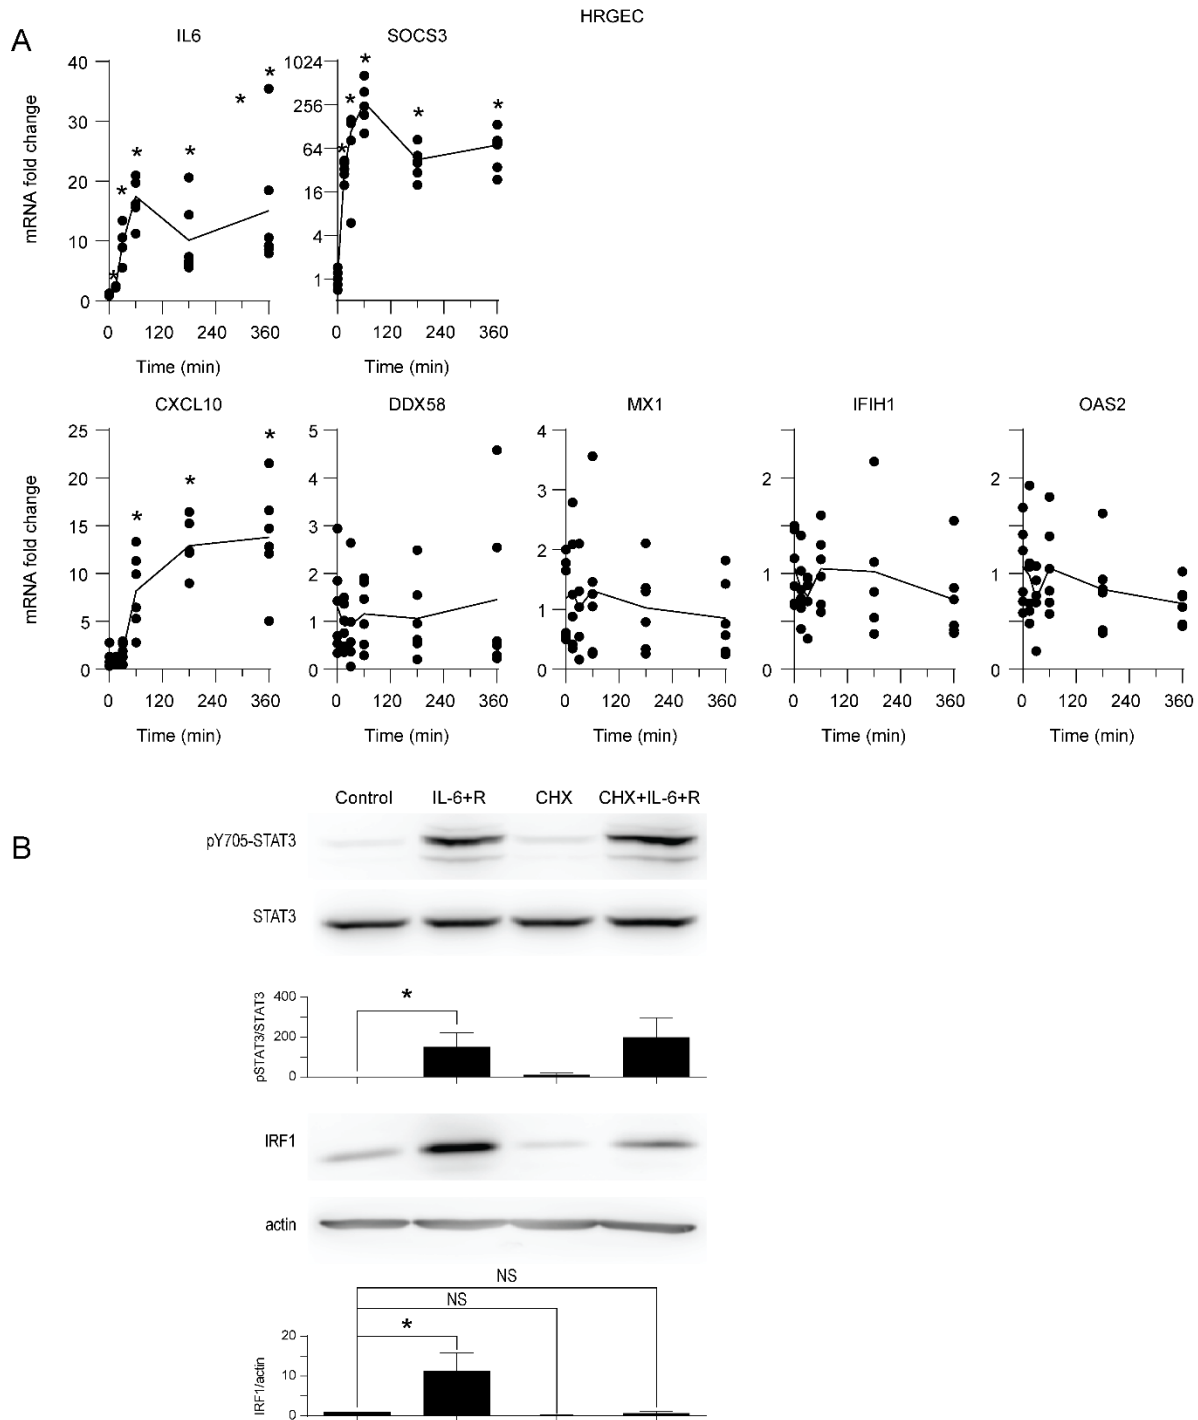

**Supplemental Figure 4. IL-6+R-induced ISG expression in HCMEC/D3 cells.** (A) Cells were treated for the indicated times with IL-6+R prior to lysis and RNA extraction for RT-qPCR. Data combined from three independent experiments performed in duplicate each. \*  $p < 0.05$ , One-way ANOVA and Sidak post-hoc test. (B) Cells were treated with or without IL-6+R for 2 h in the presence or absence of a 30 min

pretreatment with cycloheximide (CHX) prior to lysis and Western blotting. Two-way ANOVA and Sidak post-hoc test. Data from three independent experiments.

Supplemental Figure 5

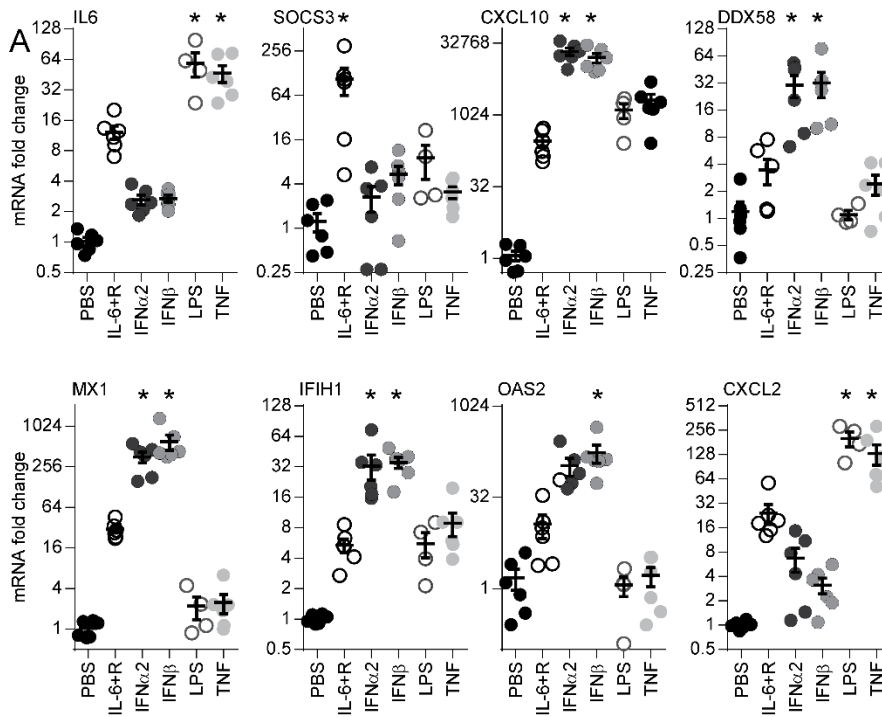

**Supplemental Figure 5. The magnitude of ISG expression induced by IL-6+R is lower than IFNI-induced changes.** HUVEC were treated for two hours with either IL-6+R, 2000 U/ml IFN $\alpha$ 2, 500 U/ml IFN $\beta$ , 1  $\mu$ g/ml LPS, or 20 ng/ml TNF prior to lysis and RT-qPCR. \* p<0.05, one-way ANOVA and Sidak post-hoc test vs PBS.

Supplemental Figure 6

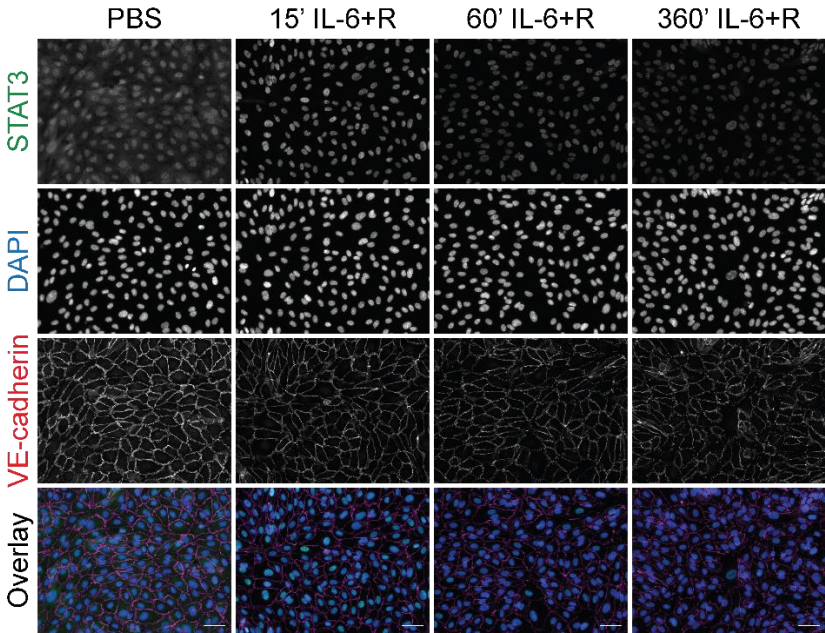

**Supplemental Figure 6. IL-6+R induces rapid nuclear localization of STAT3.** Immunofluorescence to detect total STAT3 in cells treated or not with IL-6+R. Cells were counterstained with a VE-cadherin antibody and DAPI to mark nuclei. Data representative of three independent experiments.

Supplemental Figure 7

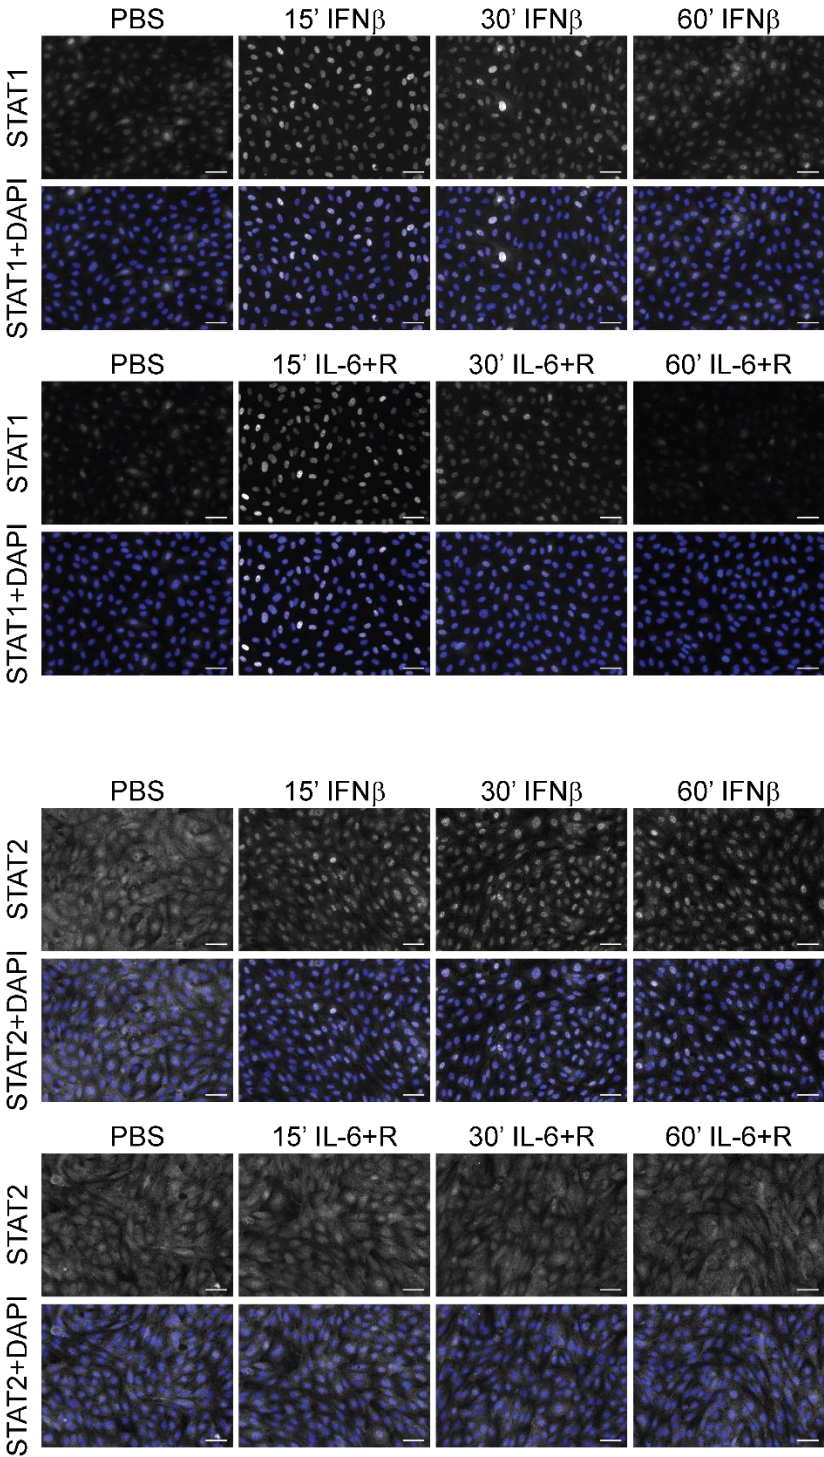

**Supplemental Figure 7. IL-6+R induces rapid nuclear localization of STAT1, but not STAT2.**  
Immunofluorescence to detect total STAT1 and STAT2 in cells treated or not with IL-6+R. Cells were

counterstained with a VE-cadherin antibody and DAPI to mark nuclei. Data representative of three independent experiments. Cells were treated in parallel with 500 U/ml IFN $\beta$  as positive control for nuclear localization of STAT1 and STAT2.

## Supplemental Figure 8

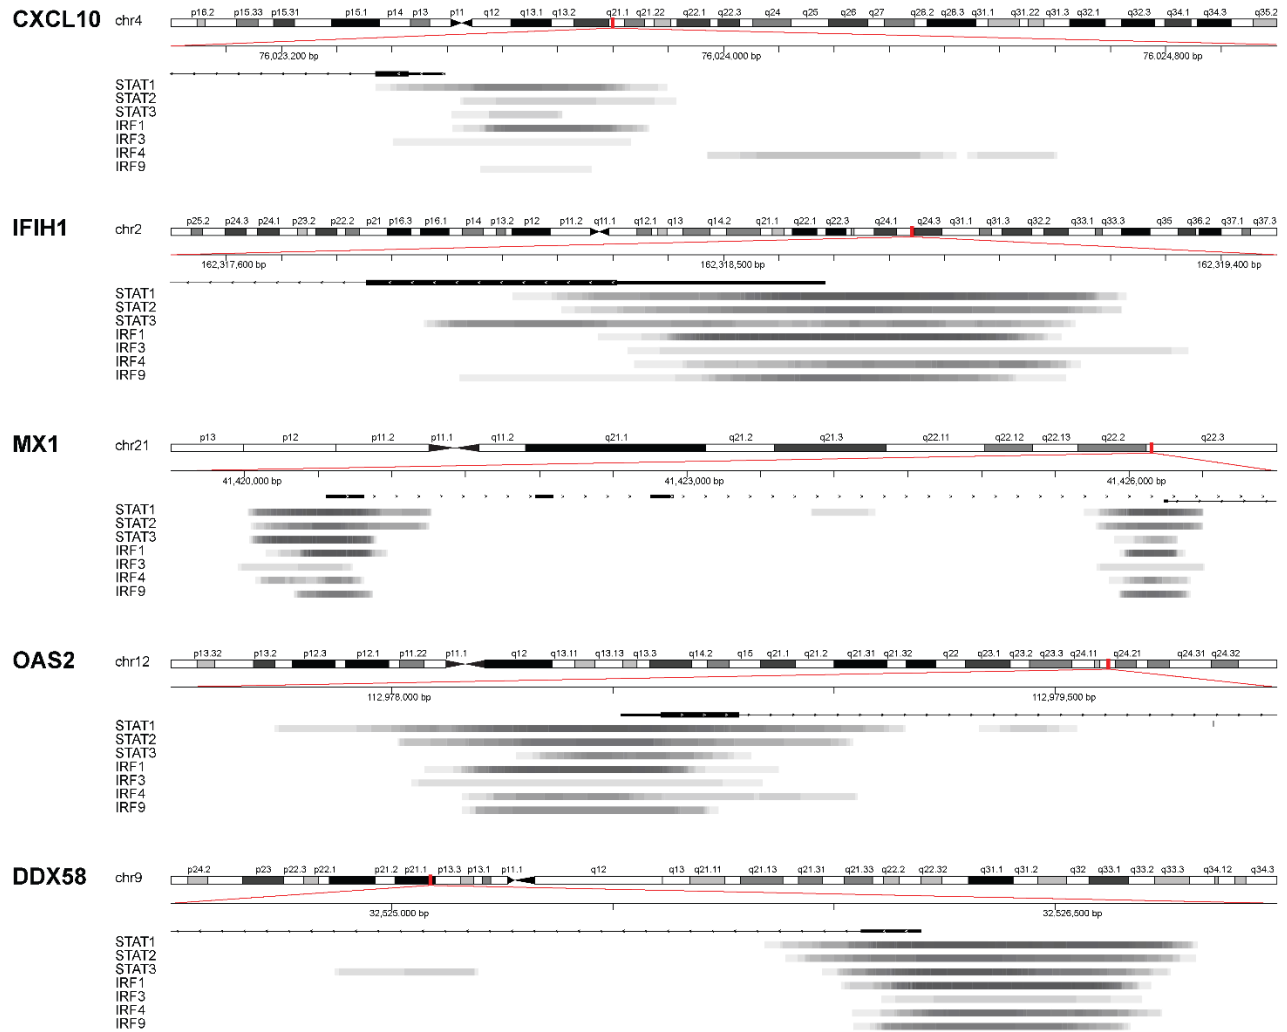

**Supplemental Figure 8. Direct IRF binding to ISG promoters.** The ChIP-Atlas database was interrogated on July 2023 for all known binding sites for STAT1/2/3 and IRF1/3/4/9, with no limits to cell type or experimental condition. Shown are the identified interactions within the proximal promoters of CXCL10, IFIH1, MX1, OAS2, and DDX58.

Supplemental Figure 9

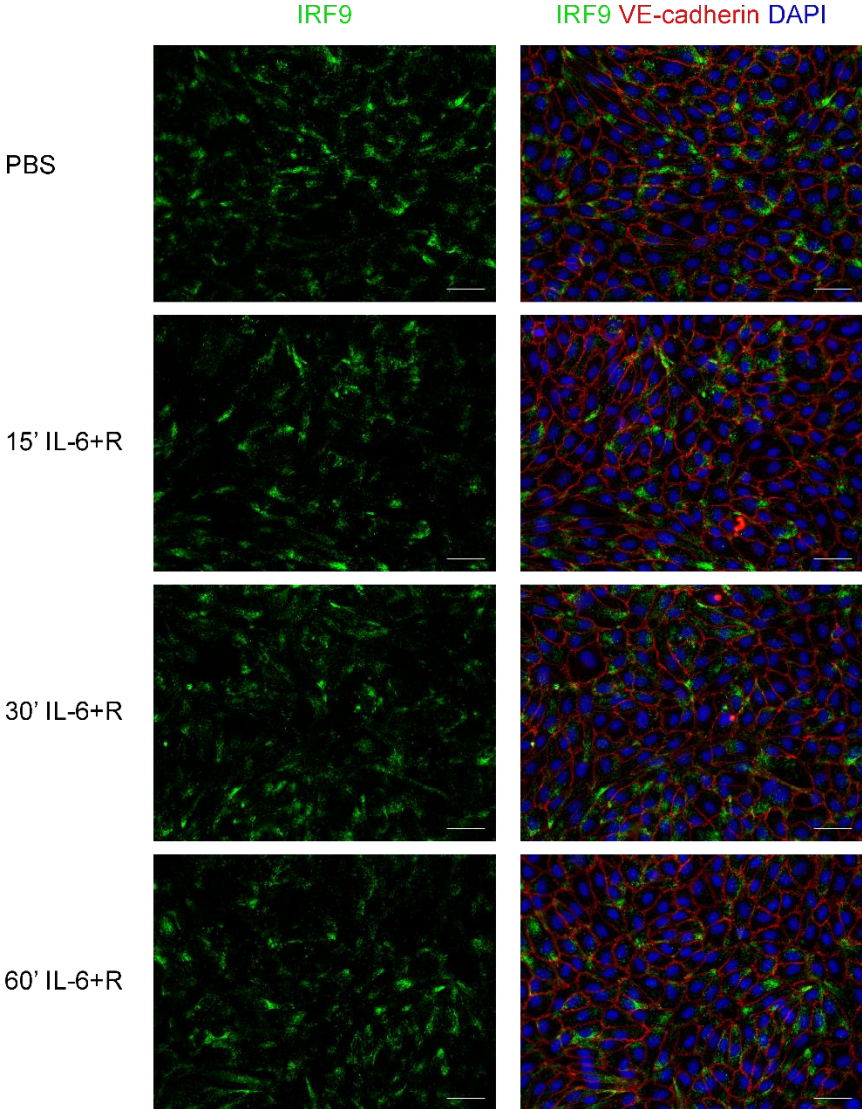

**Supplemental Figure 9. IL-6+R does not induce nuclear localization of IRF9.** Immunofluorescence to detect IRF9 in cells treated or not with IL-6+R. Cells were counterstained with a VE-cadherin antibody and DAPI to mark nuclei. Data representative of three independent experiments.

## Supplemental Figure 10

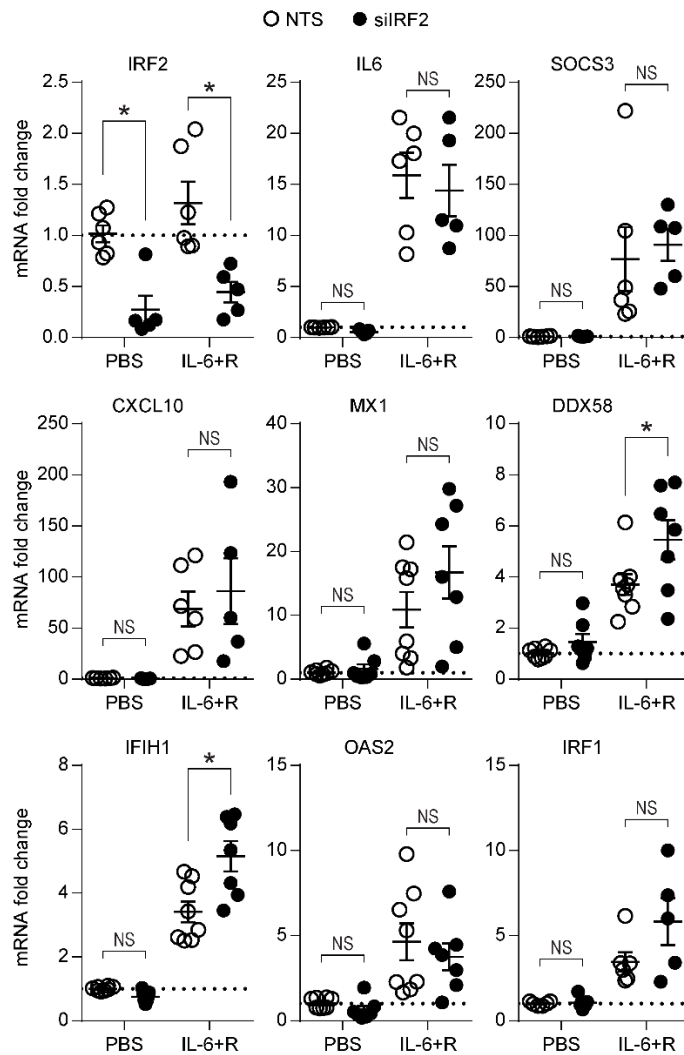

**Supplemental Figure 10. ISG expression in HUVEC in response to IL-6+R does not require expression of IRF2.** RT-qPCR of HUVEC transfected with NTS or IRF2 siRNA prior to treatment for 2 hours with or without IL-6+R. Two-way ANOVA and Sidak post-hoc test. \*  $p < 0.05$ . Data representative of at least three independent experiments.

Supplemental Figure 11

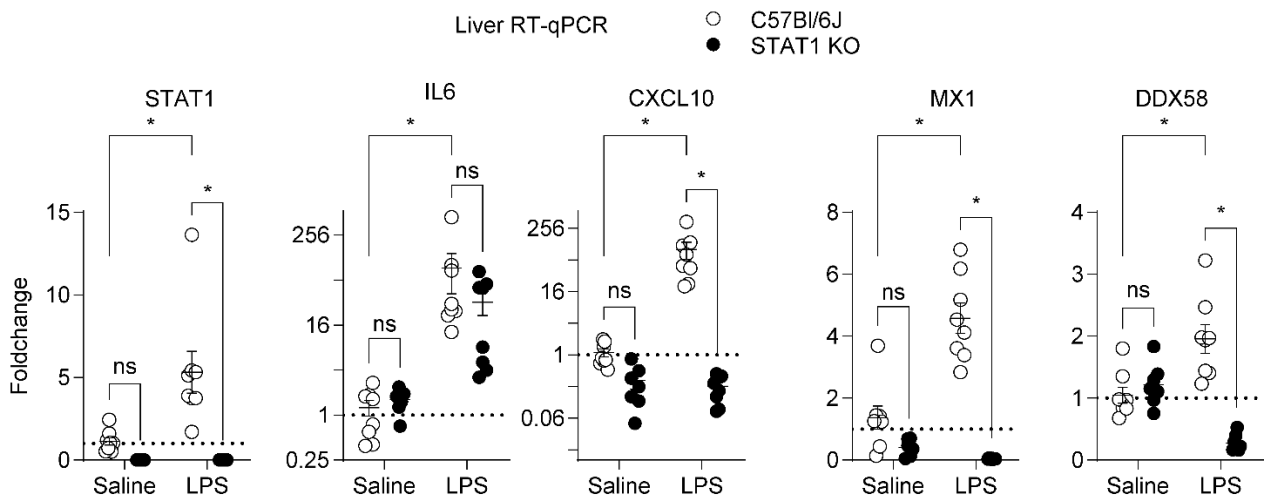

**Supplemental Figure 11. LPS-induced liver ISG expression is reduced in endotoxemic STAT1<sup>-/-</sup> mice.** RTqPCR of liver mRNA of STAT1<sup>-/-</sup> or control (C57Bl/6J) mice challenged with LPS as described for figure 12 in the main text. \*  $p < 0.05$ . Two-way ANOVA and Sidak post-hoc test ( $n=8$ ).

## Supplemental Figure 12

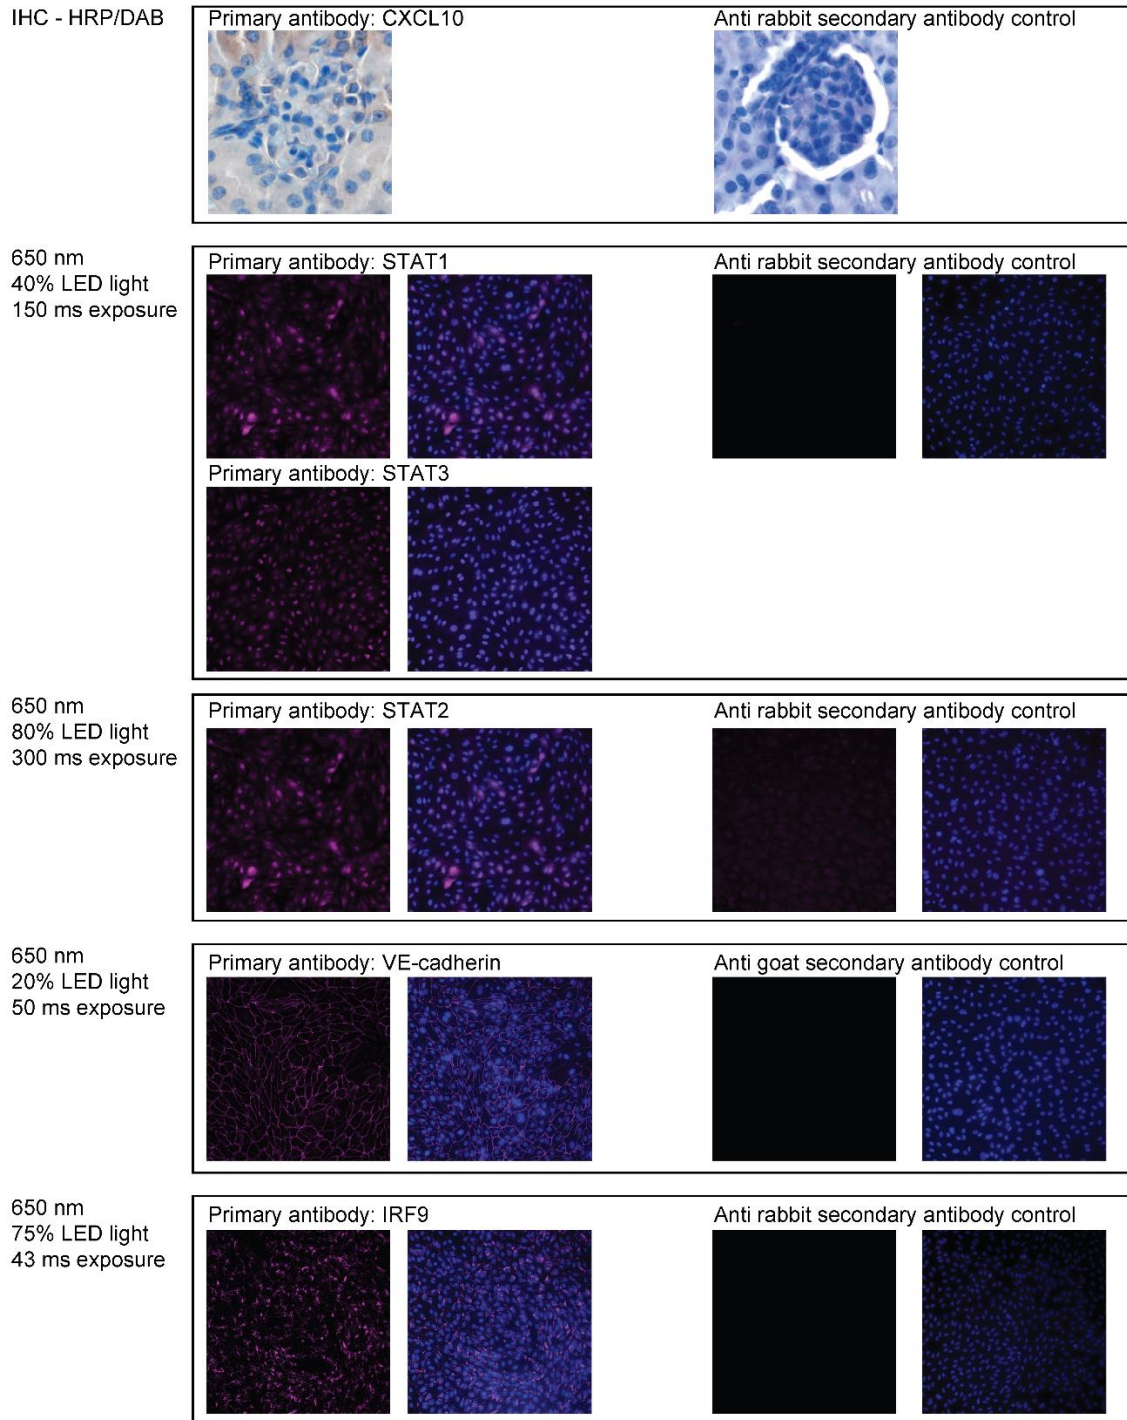

**Supplemental Figure 12. Secondary only staining controls.** Kidneys sections (IHC) or HUVEC (IF) were stained for the respective proteins and counterstained with hematoxylin or DAPI. In parallel, other sections or cultured cells were processed exactly as for the corresponding staining, but without incubation with the primary antibody. Control images were taken with the same conditions as their corresponding target.

**Supplemental Table 1 - Commercial sources for critical reagents and their catalog numbers**

| <b>M&amp;M section</b>                            | <b>Reagent or disposable</b>                          | <b>Vendor</b>               | <b>Catalog Number</b> | <b>Concentration/<br/>Dose</b> |
|---------------------------------------------------|-------------------------------------------------------|-----------------------------|-----------------------|--------------------------------|
| <b>Mice</b>                                       | Tamoxifen                                             | Sigma Aldrich               | T5648                 | 2 mg in 100 µL                 |
|                                                   | Peanut Oil                                            | Sigma Aldrich               | P2144                 | N/A                            |
|                                                   | Lipopolysaccharides                                   | Sigma Aldrich               | L4391                 | 250 µg/ 250 µL                 |
| <b>Endothelial<br/>Enrichment</b>                 | Collagenase Type 1                                    | Worthington<br>Biochemicals | LS004196              | 0.20%                          |
|                                                   | RNAse A                                               | Qiagen                      | 19101                 | 100 mg/ml                      |
|                                                   | Dispase II                                            | Roche                       | 10295825001           | 0.20%                          |
|                                                   | DNeasy Blood and Tissue kit                           | Qiagen                      | 69504                 | As per<br>instructions         |
|                                                   | RNEasy Plus Micro Kit                                 | Qiagen                      | 74034                 | As per<br>instructions         |
|                                                   | BD Falcon cell strainer 70um pore size                | Thermo Fisher               | 352350                | N/A                            |
|                                                   | Dynabeads M-280 Streptavidin                          | Thermo Scientific           | 11205D                | 1mg/100 µL                     |
| <b>Immuno-<br/>histochemistry</b>                 | ABC kit Elite                                         | Vector Labs                 | PK-6100               | N/A                            |
|                                                   | ImmPACT DAB                                           | Vector Labs                 | SK-4105               | N/A                            |
|                                                   | VectaMount                                            | Vector Labs                 | H-5000                | N/A                            |
|                                                   | Fetal bovine serum                                    | Sigma Aldrich               | F4135                 | 5%                             |
| <b>Cell Culture</b>                               | Recombinant Human IL6 protein                         | R&D Systems                 | 206-IL-200/CF         | 200 ng/mL                      |
|                                                   | Recombinant human IL6r alpha                          | R&D Systems                 | 227-SR-025/CF         | 100 ng/mL                      |
|                                                   | Phenol red-free EBM 2 media                           | PromoCell                   | C-22211               | N/A                            |
|                                                   | Growth medium 2 supplement mix                        | Promocell                   | C-39216               | 1X                             |
|                                                   | Complete Endothelial Cell Medium /w<br>Kit            | Cell Biologics              | H1168                 | 1X                             |
|                                                   | EndoGRO-MV Complete Culture<br>Media Kit              | Millipore Sigma             | SCME004               | 1X                             |
|                                                   | Penicillin-Streptomycin Solution, 100x                | Corning                     | 30-002-C1             | 1X                             |
|                                                   | Gelatin                                               | Millipore Sigma             | ES-006-B              | 0.10%                          |
|                                                   | 0.05% Trypsin-EDTA                                    | Gibco                       | 25300054              | 1x                             |
|                                                   | Ruxolitinib                                           | Selleck Chem                | S1378                 | 2 µM                           |
|                                                   | Cycloheximide                                         | Sigma                       | 357420010             | 5 µg/ml                        |
|                                                   | DMSO                                                  | Millipore Sigma             | 472301                | <0.1%                          |
|                                                   | RU-521                                                | Cayman Chemicals            | 31765                 | 10 µM                          |
|                                                   | 2'3' cGAMP                                            | Cayman Chemicals            | 19887                 | 30 µg/ml                       |
|                                                   | Recombinant Human IFN-alpha 2                         | R&D Systems                 | 11105-1               | 2000 units/ml                  |
|                                                   | Recombinant Human IFN beta protein                    | R&D Systems                 | 8499-IF-010/CF        | 500 units/ml                   |
|                                                   | TNF                                                   | R&D Systems                 | 210-TA-020            | 20 ng/ml                       |
|                                                   | Lipopolysaccharides                                   | Sigma Aldrich               | L4391                 | 1 µg/ml                        |
|                                                   | Endothelial Cell Growth Supplement                    | Discovery Labware           | 356006                | 5 mg/mL                        |
|                                                   | Heparin sodium salt from porcine<br>intestinal mucosa | Sigma                       | H3393                 | 10 mg/mL                       |
|                                                   | Sodium Pyruvate (100mM)                               | Gibco                       | 11360-070             | 1%                             |
|                                                   | GlutaMAX (100X)                                       | Gibco                       | A12860-01             | 1%                             |
| MEM Non-Essential Amino Acids<br>(100X)           | Gibco                                                 | 11140-050                   | 1%                    |                                |
| HEPES (1M)                                        | Gibco                                                 | 15630-080                   | 2.50%                 |                                |
| Dynabeads Sheep anti-Rat igG                      | Invitrogen                                            | 11035                       | 0.5 mg/mL             |                                |
| <b>Gel Electrophoresis<br/>and Immunoblotting</b> | Complete protease inhibitor mixture                   | Roche Applied               | 11697498001           | 1X                             |

|                                 |                                                        |                               |                  |                       |
|---------------------------------|--------------------------------------------------------|-------------------------------|------------------|-----------------------|
|                                 | PhosSTOP phosphatase inhibitor mixture                 | Roche Applied                 | 4906845001       | 1X                    |
|                                 | Sodium fluoride                                        | Millipore Sigma               | S-1504           | 100 mM                |
|                                 | Phenyl arsine oxide                                    | Millipore Sigma               | P-3075           | 100 µM                |
|                                 | Sodium pyrophosphate decahydrate                       | Millipore Sigma               | 221368           | 10 mM                 |
|                                 | Sodium orthovanadate                                   | Millipore Sigma               | S6508            | 100 µM                |
|                                 | Transblot Turbo RTA Mini Nitrocellulose - Transfer kit | Bio-Rad                       | 1704270          | N/A                   |
|                                 | Clarity Western ECL Substrate                          | Bio-Rad                       | 1705061          | As per instructions   |
|                                 | Clarity Max Western ECL Substrate                      | Bio-Rad                       | 1705062          | As per instructions   |
|                                 | Bovine Serum Albumin                                   | Rockland Immunochemicals      | BSA-1000         | 1-5%                  |
| <b>Immuno-fluorescence</b>      | 4',6-Diamidino-2'-phenylindole dihydrochloride (DAPI)  | Roche                         | 10236276001      | 1 µg/ml               |
|                                 | Triton X                                               | Sigma                         | T8787            | 0.1%                  |
| <b>RNA isolation and RTqPCR</b> | PrimeScript RT Master Mix                              | Clontech                      | RR036B           | 1X                    |
|                                 | TRIzol reagent                                         | Invitrogen                    | 15596018         | 1X                    |
|                                 | iTaq Universal SYBR Green Supermix                     | Bio Rad                       | 1725125          | 1X                    |
| <b>siRNA</b>                    | Rneasy Plus Micro Kit                                  | Qiagen                        | 74034            | N/A                   |
|                                 | Lipofectamine RNAiMAX transfection reagent             | Invitrogen                    | 13778150         | 6 pmol siRNA/µl lipid |
|                                 | ON-TARGETplus non-targeting control pool               | Horizon Discovery             | D-001810-10-20   | 50 nM                 |
|                                 | Opti-MEM                                               | Thermo Fisher Scientific      | 31985070         | 1X                    |
|                                 | ON-TARGETplus Human STAT1 siRNA, smartpool             | Horizon Discovery Biosciences | L-003543-00-0005 | 50 nM                 |
|                                 | ON-TARGETplus Human STAT3 siRNA, smartpool             | Horizon Discovery Biosciences | L-003544-00-0005 | 50 nM                 |
|                                 | ON-TARGETplus Human IFNAR1 siRNA, smartpool            | Horizon Discovery Biosciences | L-020209-00-0020 | 50 nM                 |
|                                 | ON-TARGETplus Human TMEM173 (STING) siRNA, smartpool   | Horizon Discovery Biosciences | L-024333-00-0005 | 50 nM                 |
|                                 | ON-TARGETplus Human IRF1 siRNA, smartpool              | Horizon Discovery Biosciences | L-011704-00-0020 | 50 nM                 |
|                                 | ON-TARGETplus Human IRF2 siRNA, smartpool              | Horizon Discovery Biosciences | L-019668-00-0020 | 50 nM                 |
|                                 | ON-TARGETplus Human IRF3 siRNA, smartpool              | Horizon Discovery Biosciences | L-006875-00-0005 | 50 nM                 |
|                                 | ON-TARGETplus Human IRF4 siRNA, smartpool              | Horizon Discovery Biosciences | L-011705-02-0020 | 50 nM                 |
|                                 | ON-TARGETplus Human TMEM173 (CGAS) siRNA, smartpool    | Horizon Discovery Biosciences | L-015607-02-0010 | 50 nM                 |
| <b>TRAP</b>                     | On Target plus non-targeting control pool              | Horizon Discovery Biosciences | D-001810-10-20   | 50 nM                 |
|                                 | Avanti Polar Lipids, 1,2-diheptanlyl-sn-glycerol       | Avanti Polar Lipids           | NC9999043        | 300 mM                |
|                                 | RNAasin Plus                                           | Promega                       | PAN2615          | 40 U/ml               |
|                                 | Protein G beads                                        | Thermo Fisher/Invitrogen      | 10004D           | 375 µl                |
|                                 | Ab for TRAP                                            | Memorial Sloan Kettering CC   | HTZGFP-19C8      | 50 µg                 |

|                              |                                                                                  |                                |             |                        |
|------------------------------|----------------------------------------------------------------------------------|--------------------------------|-------------|------------------------|
|                              | Ab for TRAP                                                                      | Memorial Sloan<br>Kettering CC | HTZGFP-19F7 | 50 µg                  |
|                              | HBSS no calcium, mg, phenol red                                                  | Gibco                          | 14175079    | 1X                     |
|                              | Complete mini EDTA free easy pack                                                | Roche                          | 4693159001  | 1X                     |
|                              | Cyclohexamide                                                                    | Sigma                          | C1988       | 100 µg/m               |
|                              | DTT-biotech grade                                                                | VWR Life Sciences              | 97061-340   | 0.5 mM                 |
|                              | Potassium Chloride ACS                                                           | VWR Life Sciences              | 97061-566   | 350 mM                 |
|                              | HEPES Free Biotechnology grade                                                   | Sigma                          | H4034       | 20 mM                  |
|                              | Magnesium Chloride                                                               | Honeywell                      | 63020       | 5 mM                   |
|                              | Diethyl pyrocarbonate (DEPC), 5ml                                                | Sigma                          | D5758       | 1X                     |
|                              | Sodium Bicarbonate                                                               | Fisher Scientific              | S233        | 4 mM                   |
|                              | (D) + Glucose                                                                    | Acros                          | 41095       | 35 mM                  |
|                              | Igepal                                                                           | MP Biomedical                  | CA-630      | 1X                     |
|                              | Disposable pellet pestles with 1.5ml<br>microtube                                | DWK Life Sciences              | 749520-0000 | N/A                    |
|                              | Cordless Pestle Motor                                                            | VWR Life Sciences              | 47747-370   | N/A                    |
|                              | Diamond Midi Centrifuge Tube, 5.0mL,<br>PP, Separate Red Screw Cap,<br>Graduated | Globe Scientific               | 111580      | N/A                    |
|                              | RNeasy Plus Micro Kit                                                            | Qiagen                         | 74034       | N/A                    |
|                              | RNAse Away                                                                       | Molecular Bioproducts          | 7002        | 1X                     |
| <b>ELISA</b>                 | IP10 ( CXCL10 ) Mouse Elisa kit                                                  | Thermo Fisher                  | BMS6018     | As per<br>instructions |
| <b>Lentivirus production</b> | HEK293FT                                                                         | Invitrogen                     | R70007      | N/A                    |
|                              | pCMV-dR8.91                                                                      | Addgene                        | 8455        | 67 µg                  |
|                              | pCMV-VSVG                                                                        | Addgene                        | 8454        | 33 µg                  |
|                              | Vivacell 100, 30,000 MWCO PES,<br>10pc                                           | Sartorius                      | VC1022      | N/A                    |
| <b>Cell fractionalion</b>    | NE-PER™ Nuclear and Cytoplasmic<br>Extraction Reagents                           | Thermo Fisher                  | 78833       | N/A                    |

**Supplemental Table 2 - Antibodies**

| <b>Target</b>      | <b>Species</b> | <b>Clone or isotype</b> | <b>Conjugate</b> | <b>Vendor</b>                                              | <b>Catalog No</b> | <b>RRID</b> |
|--------------------|----------------|-------------------------|------------------|------------------------------------------------------------|-------------------|-------------|
| <b>pY701-STAT1</b> | rabbit         | clone 58D6              |                  | Cell Signaling                                             | 9167              | AB_561284   |
| <b>STAT1</b>       | rabbit         | clone D1K9Y             |                  | Cell Signaling                                             | 14994             | AB_2737027  |
| <b>pY690-STAT2</b> | rabbit         | clone D3P2P             |                  | Cell Signaling                                             | 88410             | AB_2800123  |
| <b>STAT2</b>       | rabbit         | clone D9J7L             |                  | Cell Signaling                                             | 72604             | AB_2799824  |
| <b>pY705-STAT3</b> | rabbit         | clone D3A7              |                  | Cell Signaling                                             | 9145              | AB_2491009  |
| <b>STAT3</b>       | rabbit         | clone D1A5              |                  | Cell Signaling                                             | 8768              | AB_2722529  |
| <b>STING</b>       | rabbit         | clone D2P2F             |                  | Cell Signaling                                             | 13647             | AB_2732796  |
| <b>CGAS</b>        | rabbit         | clone E5V3W             |                  | Cell Signaling                                             | 79978             | AB_2905508  |
| <b>Tubulin</b>     | mouse          | clone DM1A              |                  | Santa Cruz                                                 | sc-322939         | AB_628412   |
| <b>Lamin A/C</b>   | rabbit         | polyclonal              |                  | Proteintech                                                | 10298-1-AP        | AB_2296961  |
| <b>β-Actin</b>     | mouse          | clone AC-15             |                  | Sigma                                                      | A5441             | AB_476744   |
| <b>Ve-Cadherin</b> | goat           | polyclonal              |                  | R&D Systems                                                | AF1002            | AB_2077789  |
| <b>pS396-IRF3</b>  | rabbit         | clone D6O1M             |                  | Cell Signaling                                             | 29047             | AB_2773013  |
| <b>IRF3</b>        | rabbit         | clone D6I4C             |                  | Cell Signaling                                             | 11904             | AB_2722521  |
| <b>IRF9</b>        | rabbit         | clone D2T8M             |                  | Cell Signaling                                             | 76684             | AB_2799885  |
| <b>HTZGFP</b>      | mouse          | clone 19C8              |                  | Memorial Sloan<br>Kettering Antibody &<br>BioResource Core | HTZGFP-19C8       | AB_2716737  |
| <b>HTZGFP</b>      | mouse          | clone 19F7              |                  | Memorial Sloan<br>Kettering Antibody &<br>BioResource Core | HTZGFP-19F7       | AB_2716736  |
| <b>CD326</b>       | rat            | clone G8.8              | Biotin           | Biolegend                                                  | 118204            | AB_1134178  |
| <b>CD45</b>        | rat            | clone 30-F11            | Biotin           | Biolegend                                                  | 103104            | AB_312969   |
| <b>CD31</b>        | rat            | clone MEC13.3           | Biotin           | Biolegend                                                  | 102504            | AB_312911   |
| <b>CD31</b>        | rat            | clone MEC13.3           |                  | BioLegend                                                  | 102502            | AB_312909   |
| <b>CD102</b>       | rat            | clone 3C4(MIC2/4)       |                  | BioLegend                                                  | 105602            | AB_313195   |
| <b>CXCL10</b>      | rabbit         | clone D5L5L             |                  | Cell Signaling                                             | 14969             | AB_2798668  |
| <b>mouse IgG</b>   | goat           | polyclonal              | HRP              | Jackson<br>Immunoresearch                                  | 115-035-062       | AB_2338504  |
| <b>rabbit IgG</b>  | goat           | polyclonal              | HRP              | Jackson<br>Immunoresearch                                  | 111-035-003       | AB_2313567  |
| <b>rabbit IgG</b>  | donkey         | polyclonal              | Alexa Fluor 647  | Invitrogen                                                 | A-31573           | AB_2536183  |
| <b>goat IgG</b>    | donkey         | polyclonal              | Alexa Fluor 594  | Invitrogen                                                 | A-11058           | AB_2534105  |
| <b>rabbit IgG</b>  | goat           | polyclonal              | Biotin           | Vector Labs                                                | BA-1000           | AB_2313606  |

**Supplemental Table 3  
Primers for RT-qPCR**

| <b>Gene</b> | <b>Forward</b>          | <b>Reverse</b>           |
|-------------|-------------------------|--------------------------|
| CXCL10      | GGTGAGAAGAGATGTCTGAATCC | GTCCATCCTTGGAAGCACTGCA   |
| CXCL2       | GGCAGAAAGCTTGTCTCAACCC  | CTCCTTCAGGAACAGCCACCAA   |
| DDX58       | CACCTCAGTTGCTGATGAAGGC  | GTCAGAAGGAAGCACTTGCTACC  |
| IFIH1       | GCTGAAGTAGGAGTCAAAGCCC  | CCACTGTGGTAGCGATAAGCAG   |
| IFIT3       | CCTGGAATGCTTACGGCAAGCT  | GAGCATCTGAGAGTCTGCCCAA   |
| IFNAR1      | CGCCTGTGATCCAGGATTATCC  | TGGTGTGTGCTCTGGCTTTTCC   |
| IL6         | TACCACTTCACAAGTCGGAGGC  | CTGCAAGTGCATCATCGTTGTTCC |
| IRF1        | GAGGAGGTGAAAGACCAGAGCA  | TAGCATCTCGGCTGGACTTCGA   |
| IRF2        | TAGAGGTGACCACTGAGAGCGA  | CTCTTCATCGCTGGGCACACTA   |
| IRF3        | TCTGCCCTCAACCGCAAAGAAG  | TACTGCCTCCACCATTGGTGTCC  |
| IRF4        | GAACGAGGAGAAGAGCATCTTCC | CGATGCCTTCTCGGAACCTTTCC  |
| MX1         | GGCTGTTTACCAGACTCCGACA  | CACAAAGCCTGGCAGCTCTCTA   |
| OAS1        | AGGAAAGGTGCTTCCGAGGTAG  | GGACTGAGGAAGACAACCAGGT   |
| OAS2        | GCTTCCGACAATCAACAGCCAAG | CTTGACGATTTTGTGCCGCTCG   |
| OAS3        | CCTGATTCTGCTGGTGAAGCAC  | TCCCAGGCAAAGATGGTGAGGA   |
| SOCS3       | CATCTCTGTGCGGAAGACCGTCA | GCATCGTACTGGTCCAGGAACT   |
| STAT1       | ATGGCAGTCTGGCGGCTGAATT  | CCAAACCAGGCTGGCACAATTG   |
| STAT3       | CTTTGAGACCGAGGTGTATCACC | GGTCAGCATGTTGTACCACAGG   |
| STING       | CCTGAGTCTCAGAACAAGTCC   | GGTCTTCAAGCTGCCACAGTA    |

**Primers for genotyping**

| <b>Primer name</b> | <b>Forward</b>            | <b>Reverse</b>         |
|--------------------|---------------------------|------------------------|
| Cdh5CreERT2        | ACCAGCCAGCTATCAACTCG      | TTACATTGGTCCAGCCACC    |
| Rosa26fsTRAP       | CTACAACAGCCACAACGTCTA     | CAAACACAGCACCTTCTTCATC |
| SOCS3 flox         | CGGGCAGGGGAAGAGACTGT      | TCGACTGTCCTCGGTCCAC    |
| STING flox         | ACACGCTCTGTTTACTATGAACCTC | GGGGGAAGGAGAGAACTGAC   |

## Supplemental code

```

library(parallel)
library(Rsubread)
library(gplots)
library(openxlsx)
library(edgeR)
library(limma)
library(DESeq2)
library(geneFilter)
library(RColorBrewer)
library(org.Mm.eg.db)
library(cluster)
library(factoextra)
library(clusterProfiler)
library(sva)
library(systemPipeR)
library(rtracklayer)
library(stringr)
library(GenomicFeatures)
library(progeny)
library(decoupleR)
library(dplyr)
library(tibble)
library(tidyr)
library(pheatmap)
library(ggplot2)
library(ggrepel)
library(ReactomePA)
library(graphite)
library(igraph)
library(ggraph)

runEdger <- function (data, samplotype="samples", contrast, topnum) {
  group <- factor(as.character(data[1,]))
  tmpdata <- data
  data <- as.data.frame(lapply(tmpdata[2:nrow(tmpdata),], as.numeric))
  rownames(data) <- rownames(tmpdata[2:nrow(tmpdata),])
  y <- DGEList(counts=data, group=group)
  keep<-filterByExpr(y)
  y<-y[keep,,keep.lib.sizes=FALSE]
  y<-normLibSizes(y)
  design<-model.matrix(~0+group,data=y$samples)
  y<-estimateDisp(y,design)
  v <- voom(y,design)
  fit <- lmFit(v)

  if (contrast=="LPSvsSaline") {
    cont.matrix <- makeContrasts(LPSvsSaline = group3_Oil_LPS - group1_Oil_Saline, levels=design) }
  else if (contrast=="LPS_KOvsWT") {
    cont.matrix <- makeContrasts(LPS_KOvsWT = group4_TMX_LPS - group3_Oil_LPS, levels=design) }
  else if (contrast=="Saline_KOvsWT") {
    cont.matrix <- makeContrasts(Saline_KOvsWT = group2_TMX_Saline - group1_Oil_Saline,
levels=design) }
  else if (contrast=="LPS_KOvsSaline_WT") {
    cont.matrix <- makeContrasts(LPS_KOvsSaline_WT = group4_TMX_LPS - group1_Oil_Saline,
levels=design) }
  else if (contrast=="LPS_KOvsSaline_KO") {
    cont.matrix <- makeContrasts(LPS_KOvsSaline_KO = group4_TMX_LPS - group2_TMX_Saline,
levels=design) }

  fit.cont <- contrasts.fit(fit, cont.matrix)
  fit.cont <- eBayes(fit.cont)
  dim(fit.cont)
  summa.fit <- decideTests(fit.cont)
  summary(summa.fit)
  top <- topTable(fit.cont, sort.by = "P", adjust="BH", n = topNumber)
  topAll <- merge(top, data, by = 'row.names')
  topAll <- topAll[order(-topAll$logFC),]
  colnames(topAll)[1] <- "SYMBOL"
  rownames(topAll) <- topAll$SYMBOL
  write.csv(topAll, file=paste(samplotype,"_",contrast,"_top",topnum,".csv", sep=""),row.names =
FALSE)

```

```

counts <- topAll[,8:ncol(topAll)]
counts <- t(apply(counts, 1, cal_z_score))
pal_breaks <- c(seq(min(counts)*0.9, 0, length.out = 33),
               seq(0.03, 1, length.out = 33),
               seq(1.03, max(counts)*0.9, length.out = 34))
if (!is.null(dev.list())) {dev.off()}
pdf(paste(sampletype, "_", contrast, "_heatmap_top", topnum, ".pdf", sep=""), useDingbats=FALSE)
pheatmap(counts, cluster_rows = FALSE, cluster_cols = FALSE, fontsize = 8, angle_col = 90,
         cellwidth=10, cellheight = 0.75, show_rownames = FALSE, show_colnames = TRUE,
         color = pal, breaks = pal_breaks)
dev.off()

top$diffexpressed <- "NO"
top$diffexpressed[top$logFC > log2(2) & top$P.Value < 0.05] <- "UP"
top$diffexpressed[top$logFC < log2(0.5) & top$P.Value < 0.05] <- "DOWN"

pdf(paste(sampletype, "_", contrast, "_volcano.pdf", sep=""), useDingbats=FALSE)
print(
  ggplot(data = top, aes(x = logFC, y = -log10(P.Value), col = diffexpressed)) +
    theme_classic() +
    geom_vline(xintercept = c(log2(0.5), log2(2)), col = "gray", linetype = 'dashed') +
    geom_hline(yintercept = -log10(0.05), col = "gray", linetype = 'dashed') +
    geom_point(size = 0.5) +
    scale_color_manual(values = c("#0000FF", "#BBBBBB", "#FF0000"), labels = c("Downregulated",
"Not significant", "Upregulated")) +
    labs(color = sampletype, x = expression("log"[2]*"(FC)"), y = expression("-log"[10]*"(P)")) +
    scale_x_continuous(expand = c(0, 0)) +
    scale_y_continuous(expand = c(0, 0))
)
dev.off()

return (topAll)
}

runGSEA <- function (top, sampletype="samples") {
  top <- top[order(-top$logFC),]
  geneList <- top$logFC
  names(geneList) <- rownames(top)
  gsel <- clusterProfiler::gseGO(geneList = geneList,
                                ont = "BP",
                                keyType = "SYMBOL",
                                minGSSize = 3,
                                maxGSSize = 800,
                                pvalueCutoff = 0.05,
                                verbose = TRUE,
                                OrgDb = org.Mm.eg.db,
                                pAdjustMethod = "BH")

  gse_results1 <- enrichplot::dotplot(gsel, showCategory=20)
  if (!is.null(dev.list())) {dev.off()}
  pdf(paste(sampletype, "_", contrast, "_GSEA.pdf", sep=""), useDingbats=FALSE)
  print(gse_results1)
  dev.off()
  write.csv(gsel, paste(sampletype, "_", contrast, "_GSEA.csv"), quote=F)
  return (gsel)
}

runDecouplerPathways <- function (sampletype="samples", data, top, treatConditions, contrast) {
  tmpdata <- data
  data <- as.data.frame(lapply(tmpdata[3:nrow(tmpdata)], as.numeric))
  rownames(data) <- rownames(tmpdata[3:nrow(tmpdata),])

  activities <- run_wmean(mat=data, net=net, .source='source', .target='target',
                        .mor='weight', times = 100, minsize = 5)
  activities_mat <- activities %>%
  filter(statistic == 'norm_wmean') %>%
  pivot_wider(id_cols = 'condition', names_from = 'source',
             values_from = 'score') %>%
  column_to_rownames('condition') %>%
  as.matrix()
  activities_mat <- scale(activities_mat)

```

```

palette_length = 100
my_color = colorRampPalette(c("Darkblue", "white","red"))(palette_length)

my_breaks <- c(seq(-3, 0, length.out=ceiling(palette_length/2) + 1),
              seq(0.05, 3, length.out=floor(palette_length/2)))
if (!is.null(dev.list())) {dev.off()}
pdf(paste(sampletype,"_",contrast,"_PathwaysHM.pdf", sep=""), useDingbats=FALSE)
pheatmap(activities_mat, border_color = NA, color=my_color, breaks = my_breaks)
dev.off()

deg <- as.matrix(top$t)
rownames(deg) <- rownames (top)
contrast_acts <- run_wmean(mat=deg, net=net, .source='source', .target='target',
                          .mor='weight', times = 100, minsize = 5)
f_contrast_acts <- contrast_acts %>%
  filter(Statistic == 'norm_wmean')
if (!is.null(dev.list())) {dev.off()}
pdf(paste(sampletype,"_",contrast,"_Pathways.pdf", sep=""), useDingbats=FALSE)
print (
  ggplot(f_contrast_acts, aes(x = reorder(source, score), y = score)) +
  geom_bar(aes(fill = score), stat = "identity") +
  scale_fill_gradient2(low = "darkblue", high = "indianred",
                      mid = "whitesmoke", midpoint = 0) +
  theme_minimal() +
  theme(axis.title = element_text(face = "bold", size = 12),
        axis.text.x =
          element_text(angle = 45, hjust = 1, size =10, face= "bold"),
        axis.text.y = element_text(size =10, face= "bold"),
        panel.grid.major = element_blank(),
        panel.grid.minor = element_blank()) +
  xlab("Pathways"))
dev.off()

pathway <- 'JAK-STAT'

df <- net %>%
  filter(source == pathway) %>%
  arrange(target) %>%
  mutate(ID = target, color = "3") %>%
  column_to_rownames('target')
inter <- sort(intersect(rownames(deg), rownames(df)))
df <- df[inter, ]
df['t_value'] <- deg[inter, ]
df <- df %>%
  mutate(color = if_else(weight > 0 & t_value > 0, '1', color)) %>%
  mutate(color = if_else(weight > 0 & t_value < 0, '2', color)) %>%
  mutate(color = if_else(weight < 0 & t_value > 0, '2', color)) %>%
  mutate(color = if_else(weight < 0 & t_value < 0, '1', color))

if (!is.null(dev.list())) {dev.off()}
pdf(paste(sampletype,"_",contrast,"_",pathway,".pdf", sep=""), useDingbats=FALSE)
print (
  ggplot(df, aes(x = weight, y = t_value, color = color)) + geom_point() +
  scale_colour_manual(values = c("red","royalblue3","grey")) +
  geom_label_repel(aes(label = ID)) +
  theme_minimal() +
  theme(legend.position = "none") +
  geom_vline(xintercept = 0, linetype = 'dotted') +
  geom_hline(yintercept = 0, linetype = 'dotted') +
  ggtitle(pathway))
dev.off()
}

runDecouplerTFs <- function (sampletype="samples", data, top, treatConditions, contrast, n_tfs, tf =
"STAT1") {
  dataUp <- top
  rownames(dataUp) <- toupper(rownames(dataUp))

  tmpdata <- data
  data <- as.data.frame(lapply(tmpdata[3:nrow(tmpdata),], as.numeric))
  rownames(data) <- rownames(tmpdata[3:nrow(tmpdata),])
  rownames(data) <- toupper(rownames(data))

```

```

sample_acts <- run_wmean(mat=data, net=netTF, .source='source', .target='target',
                        .mor='mor', times = 100, minsize = 5)
sample_acts_mat <- sample_acts %>%
  filter(statistic == 'norm_wmean') %>%
  pivot_wider(id_cols = 'condition', names_from = 'source',
              values_from = 'score') %>%
  column_to_rownames('condition') %>%
  as.matrix()

# Get top tfbs with more variable means across clusters
tfs <- sample_acts %>%
  group_by(source) %>%
  summarise(std = sd(score)) %>%
  arrange(-abs(std)) %>%
  head(n_tfs) %>%
  pull(source)
sample_acts_mat <- sample_acts_mat[,tfs]

# Scale per sample
sample_acts_mat <- scale(sample_acts_mat)

# Choose color palette
palette_length = 100
my_color = colorRampPalette(c("Darkblue", "white","red"))(palette_length)

my_breaks <- c(seq(-3, 0, length.out=ceiling(palette_length/2) + 1),
               seq(0.05, 3, length.out=floor(palette_length/2)))

if (!is.null(dev.list())) {dev.off()}
pdf(paste(sampletype,"_",contrast,"_TFsHM.pdf", sep=""), useDingbats=FALSE)
pheatmap(sample_acts_mat, border_color = NA, color=my_color, breaks = my_breaks)
dev.off()

contrast_acts <- run_wmean(mat=dataUp[, 't', drop=FALSE], net=netTF, .source='source',
                          .target='target',
                          .mor='mor', times = 100, minsize = 5)
f_contrast_acts <- contrast_acts %>%
  filter(statistic == 'norm_wmean') %>%
  mutate(rnk = NA)
msk <- f_contrast_acts$score > 0
f_contrast_acts[msk, 'rnk'] <- rank(-f_contrast_acts[msk, 'score'])
f_contrast_acts[!msk, 'rnk'] <- rank(-abs(f_contrast_acts[!msk, 'score']))
tfs <- f_contrast_acts %>%
  arrange(rnk) %>%
  head(n_tfs) %>%
  pull(source)
f_contrast_acts <- f_contrast_acts %>%
  filter(source %in% tfs)

if (!is.null(dev.list())) {dev.off()}
pdf(paste(sampletype,"_",contrast,"_TFs.pdf", sep=""), useDingbats=FALSE)
print (
  ggplot(f_contrast_acts, aes(x = reorder(source, score), y = score)) +
  geom_bar(aes(fill = score), stat = "identity") +
  scale_fill_gradient2(low = "darkblue", high = "indianred",
                       mid = "whitesmoke", midpoint = 0) +
  theme_minimal() +
  theme(axis.title = element_text(face = "bold", size = 12),
        axis.text.x =
          element_text(angle = 45, hjust = 1, size =10, face= "bold"),
        axis.text.y = element_text(size =10, face= "bold"),
        panel.grid.major = element_blank(),
        panel.grid.minor = element_blank()) +
  xlab("Pathways"))
dev.off()

df <- netTF %>%
  filter(source == tf) %>%
  arrange(target) %>%
  mutate(ID = target, color = "3") %>%
  column_to_rownames('target')

```

```

inter <- sort(intersect(rownames(dataUp), rownames(df)))
df <- df[inter, ]
df[,c('logfc', 't_value', 'p_value')] <- dataUp[inter, c(2,4,6)]
df <- df %>%
  mutate(color = if_else(mor > 0 & t_value > 0, '1', color)) %>%
  mutate(color = if_else(mor > 0 & t_value < 0, '2', color)) %>%
  mutate(color = if_else(mor < 0 & t_value > 0, '2', color)) %>%
  mutate(color = if_else(mor < 0 & t_value < 0, '1', color))

if (!is.null(dev.list())) {dev.off()}
pdf(paste(samplotype, "_", contrast, "_", tf, ".pdf", sep=""), useDingbats=FALSE)
print (
  ggplot(df, aes(x = logfc, y = -log10(p_value), color = color, size=abs(mor))) +
    geom_point() +
    scale_colour_manual(values = c("red", "royalblue3", "grey")) +
    geom_label_repel(aes(label = ID, size=1)) +
    theme_minimal() +
    theme(legend.position = "none") +
    geom_vline(xintercept = 0, linetype = 'dotted') +
    geom_hline(yintercept = 0, linetype = 'dotted') +
    ggtitle(tf))
dev.off()
}

runReactome <- function (top, samplotype="samples") {
  top <- top[order(-top$logFC),]
  geneList <- top$logFC
  symbols <- rownames(top)
  eg = clusterProfiler::bitr(symbols, fromType="SYMBOL", toType="ENTREZID", OrgDb="org.Mm.eg.db")
  names(geneList) <- eg$ENTREZID
  y <- gsePathway(geneList,
    organism = "mouse",
    pvalueCutoff = 0.2,
    pAdjustMethod = "BH",
    verbose = FALSE)

  head(y)
  gse_results1 <- enrichplot::dotplot(y, showCategory=20)
  if (!is.null(dev.list())) {dev.off()}
  pdf(paste(samplotype, "_", contrast, "_Reactome.pdf", sep=""), useDingbats=FALSE)
  print(gse_results1)
  dev.off()
  write.csv(y, paste(samplotype, "_", contrast, "_Reactome.csv"), quote=F)
  return (y)
}

viewPathways <- function (pathwayNumber = 1, top, reactome, samplotype="samples") {
  print (reactome$Description[pathwayNumber])
  core_enr <- as.vector(strsplit(reactome$core_enrichment[pathwayNumber], "\\[/]")[[1]])
  symbols = clusterProfiler::bitr(core_enr, fromType="ENTREZID", toType=c("SYMBOL", "GENENAME"),
  OrgDb="org.Mm.eg.db")
  rownames(symbols) <- symbols$SYMBOL
  fc <- merge(symbols, y, by = 'row.names')$logFC
  names(fc) <- core_enr
  fc2 <- merge(symbols, y, by = 'row.names')
  fc2 <- fc2[,c(9,6,3)]
  colnames(fc2) <- c("pvalue", "logFC", "gene")
  fc3 = fc2$logFC
  names(fc3) <- fc2$gene
  print(
    viewPathway2(samplotype, reactome$Description[pathwayNumber],
      organism = "mouse",
      readable = TRUE,
      foldChange = fc3)
  )
}

viewPathway2 <- function(samplotype,
  pathName,
  organism="human",
  readable=TRUE,

```

```

        foldChange=NULL,
        keyType = "ENTREZID",
        layout = "kk"){
print (pathName)
org2org <- list(arabidopsis="athaliana",
               bovine="btaurus",
               canine="cfamiliaris",
               chicken="ggallus",
               ecolik12="ecoli",
               fly="dmelanogaster",
               human="hsapiens",
               mouse="mmusculus",
               pig="sscrofa",
               rat="rnorvegicus",
               celegans="celegans",
               xenopus="xlaevis",
               yeast="scerevisiae",
               zebrafish="drerio")

if(!(organism %in% names(org2org))){
  cat(paste(c("the list of supported organisms:",names(org2org)), collapse='\n'))
  stop(sprintf("organism %s is not supported", organism))
}
pathways <- eval(parse(text="pathways"))
p <- pathways(org2org[[organism]], 'reactome')[[pathName]]

p <- convertIdentifiers(p, "symbol")

g <- pathwayGraph(p)
gg <- igraph.from.graphNEL(g)
gg <- as.undirected(gg)
gg <- setting.graph.attributes(gg)
V(gg)$name <- sub("[^:]+:", "", V(gg)$name)

if (!is.null(foldChange)) {
  fch <- foldChange[V(gg)$name]
  V(gg)$color <- fch
}

print(
  ggraph(gg, layout=layout) +
  geom_edge_link(alpha=.8, colour='darkgrey') +
  geom_node_point(aes_(color=~as.numeric(as.character(color)), size=~size)) +
  scale_color_continuous(low="red", high="blue", name = "fold change", na.value = "#E5C494") +
  geom_node_text(aes_(label=~name), repel=TRUE, max.overlaps=Inf) +
  ## scale_color_gradientn(name = "fold change", colors=palette, na.value = "#E5C494") +
  scale_size(guide = "none") + theme_void()
)
names <- V(gg)$name
fold <- foldChange[V(gg)$name]
genelist <- as.data.frame(cbind(names, fold))
genelist <- genelist[!is.na(genelist$fold),]
write.csv(genelist, paste(sampletype,"_",contrast,"_Reactome_", pathName, ".csv"), quote=F)
print (paste(sampletype,"_",contrast,"_Reactome_", pathName, ".csv"))
}

setting.graph.attributes <- function(g, node.size=8,
                                   node.color="#B3B3B3",
                                   edge.width=2,
                                   edge.color="#8DA0CB") {

  V(g)$size <- node.size
  V(g)$color <- node.color
  V(g)$label <- V(g)$name

  E(g)$width <- edge.width
  E(g)$color <- edge.color

  return(g)
}

plotReactomeHeatmap <- function (pathwayNumber, y, reactome) {
  print (reactome$Description[pathwayNumber])

```

```

reactome$Description[pathwayNumber]
core_enr <- as.vector(strsplit(reactome$core_enrichment[pathwayNumber], "\\\/")[[1]])
symbols = clusterProfiler::bitr(core_enr, fromType="ENTREZID", toType=c("SYMBOL", "GENENAME"),
OrgDb="org.Mm.eg.db")
rownames(symbols) <- symbols$SYMBOL
counts <- merge(symbols, y, by = 'row.names')
rownames(counts) <- counts$SYMBOL.x
counts <- counts[,12:ncol(counts)]
counts <- t(apply(counts, 1, cal_z_score))
print(colSums(counts))
pal_breaks <- c(seq(min(counts)*0.9, 0, length.out = 33),
seq(0.03, 1, length.out = 33),
seq(1.03, max(counts)*0.9, length.out = 34))
pheatmap(counts, cluster_rows = FALSE, cluster_cols = FALSE, fontsize = 8, angle_col = 90,
cellwidth=10, cellheight = 0.75, show_rownames = FALSE, show_colnames = TRUE,
color = pal, breaks = pal_breaks)
}

plotGOTermHeatmap <- function(GOTable, GOterm, samplotype, y) {
GOTable <- GOTable[!duplicated(GOTable$SYMBOL),]
GOTable <- GOTable[!is.na(GOTable$SYMBOL),]
rownames(GOTable) <- GOTable$SYMBOL
GOTable2 <- merge(GOTable, y, by = 'row.names')
GOTable2 <- GOTable2[,7:ncol(GOTable2)]
GOTable3 <- GOTable2[GOTable2$adj.P.Val<0.05,]

counts <- GOTable3[,8:ncol(GOTable3)]
rownames(counts) <- GOTable3$SYMBOL
counts <- t(apply(counts, 1, cal_z_score))
print(colSums(counts))
pal_breaks <- c(seq(min(counts)*0.9, 0, length.out = 33),
seq(0.03, 1, length.out = 33),
seq(1.03, max(counts)*0.9, length.out = 34))
pheatmap(counts, cluster_rows = TRUE, cluster_cols = FALSE, fontsize = 8, angle_col = 90,
cellwidth=10, cellheight = 0.75, show_rownames = FALSE, show_colnames = TRUE,
color = pal, breaks = pal_breaks)
write.csv(GOTable3, paste(samplotype,"_",contrast,"_GO_", GOterm, ".csv"), quote=F)
}

cal_z_score <- function(x){ (x - mean(x)) / sd(x) }
#Identify many cores have to use
detectCores()
#Puget computer has 128 cores to use

# Read the sample information into R
sampleTable <- read.csv('metadata_STING.csv', header = TRUE, sep = ",")
sampleTable

#Upload to environment FASTQ files
reads1 <- list.files(path = "./01_trim", pattern = "R1_001_val_1.fq.gz$", full.names = TRUE)
reads2 <- list.files(path = "./01_trim", pattern = "R2_001_val_2.fq.gz$", full.names = TRUE)

align( index = "~/bioinf/Core/1_index_rnaseq/mm10_index/mm10",
readfile1 = reads1,
readfile2 = reads2,
type = 'rna',
input_format = "gzFASTQ",
output_format = "BAM",
PE_orientation = 'fr',
nthreads = 64 ) #use the parallel to identify how many cores have to use

#Have a variable with all the bam files
bam.files <- list.files(path = "./02_bam", pattern = ".BAM$", full.names = TRUE)
bam.files

#The function propmapped returns the proportion of mapped reads in the output SAM file:
#total number of input reads, number of mapped reads and proportion of mapped reads.
props <- propmapped(files=bam.files)
props

#Rsubread provides a read summarization function featureCounts, which takes two inputs:
# 1. the aligned reads (BAM or SAM) and assigns them to

```

```

# 2. genomic features (GTF annotation file)
seqdata <- featureCounts( bam.files, useMetaFeatures = TRUE, annot.inbuilt = "mm10", isPairedEnd =
TRUE,
                        nthreads = 64)

#matrix with the counts
gene.counts <- seqdata$counts
#Save the Ids for the lines
gene.ids <- seqdata$annotation$GeneID

#Convert counts to DGEList object
y <- DGEList(gene.counts)

#Add groups for the samples
group <- paste(sampleTable$CellType)

# Convert to factor
group <- factor(group)

# Add the group information into the DGEList
y$samples$group <- group
y$samples

#build up our annotation information in a separate data frame using the select function
ann <-
AnnotationDbi::select(org.Mm.eg.db, keys=rownames(y$counts), columns=c("ENTREZID", "SYMBOL", "GENENAME"))

#merge data with the annotation (ann)
y$genes <- ann

#Filtering lowly expressed genes#
#counts-per-million (CPM) above 0.5 in at least two samples
myCPM <- cpm(gene.counts)
thresh <- myCPM > 0.5
keep <- rowSums(thresh) >= 2

# Subset the rows of countdata to keep the more highly expressed genes
counts.keep <- gene.counts[keep,]

#filter the DGEList object
y <- y[keep, keep.lib.sizes=FALSE]

#Save csv file
#If analyzing sorted ECs
write.csv(y, file="Endo.csv")
#If analyzing total kidney
write.csv(y, file="Total.csv")

pal = colorRampPalette(c("#0000FF", "#FFFFFF", "#FFFF00", "#FF0000"))(100)

net <- get_progeny(organism = 'mouse', top = 100)
netTF <- get_collectri(organism='mouse', split_complexes=FALSE)

setwd("D:/OneDrive - Albany Medical Center/Projects/RNA-Seq/STING KO/9-18-24")

treatConditions <-read.csv("decoupleRconditions.csv", header = T)

#For STINGiEKO kidneys
data_ke <-read.csv("Endo.csv", header = T, row.names="SYMBOL")
data_wk <-read.csv("Total.csv", header = T, row.names="SYMBOL")

#For SOCS3iEKO TRAP
data_bt <-read.csv("BrainTRAP_LPS15h.csv", header = T, row.names="SYMBOL")
data_wb <-read.csv("WholeBrain_LPS15h.csv", header = T, row.names="SYMBOL")
data_kt <-read.csv("KidneyTRAP_LPS15h.csv", header = T, row.names="SYMBOL")
data_wk <-read.csv("WholeKidney_LPS15h.csv", header = T, row.names="SYMBOL")

#Choose a max number of top genes

```

```

topNumber = 100
topNumber = Inf

#Choose 1:
name <- "KidneyEndo"
data <- data_ke

name <- "WholeKidney"
data <- data_wk

data <- data_bt
name <- "BrainTRAP"

data <- data_wb
name <- "WholeBrain"

data <- data_kt
name <- "KidneyTRAP"

data <- data_wk
name <- "WholeKidney"
#From all the above

#Choose 1:
contrast <- "LPSvsSaline"
contrast <- "LPS_KOvsWT"
contrast <- "Saline_KOvsWT"
contrast <- "LPS_KOvsSaline_WT"
contrast <- "LPS_KOvsSaline_KO"
#From all the above

y <- runEdger(data, name, contrast, topNumber)
gsea <- runGSEA(y, name)
runDecouplerPathways(name, data, y, treatConditions, contrast)
runDecouplerTFs(name, data, y, treatConditions, contrast, 30)

reactome <- runReactome(y, name)
#choose pathway number from reactome result table
viewPathways(1, y, reactome, name)
plotReactomeHeatmap(1, y, reactome)

ISGlist <- (read.csv("ISG list.csv", header = F))$V1

yy <- filter(y, SYMBOL %in% ISGlist)
yy <- yy[yy$adj.P.Val<0.05,]
yy <- yy[order(yy$logFC),]
counts <- yy[,8:ncol(yy)]
counts <- t(apply(counts, 1, cal_z_score))
print(colSums(counts))
pal_breaks <- c(seq(min(counts)*0.9, 0, length.out = 33),
               seq(0.03, 1, length.out = 33),
               seq(1.03, max(counts)*0.9, length.out = 34))
pheatmap(counts, cluster_rows = FALSE, cluster_cols = FALSE, fontsize = 8, angle_col = 90,
          cellwidth=10, cellheight = 7, show_rownames = TRUE, show_colnames = TRUE,
          color = pal, breaks = pal_breaks)
write.csv(yy, "ISGlistFolds.csv")

```
